# Supplementary material
Source: PubMed Central journal article supplement (PMC9867801)

# Figure S1

(A)

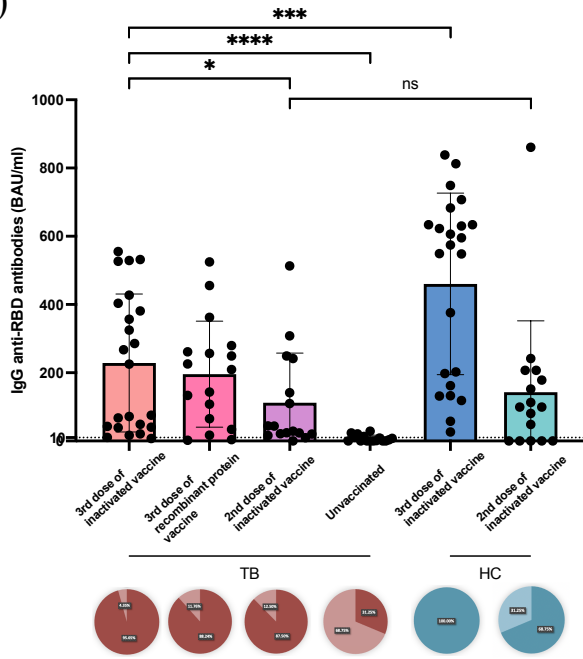

(B)

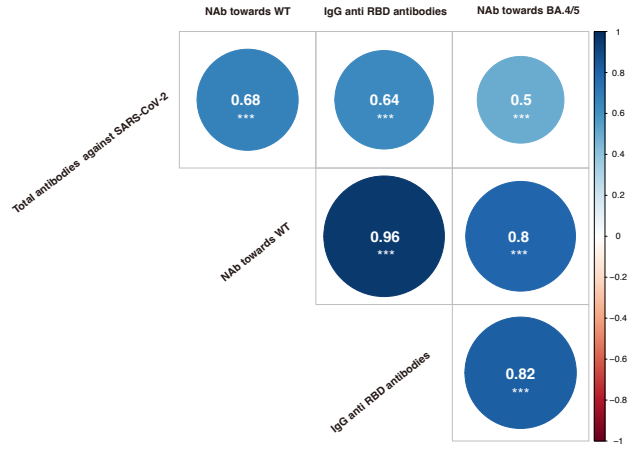

Supplement: mmc1.pdf [file mmc1.pdf]

# Figure S2

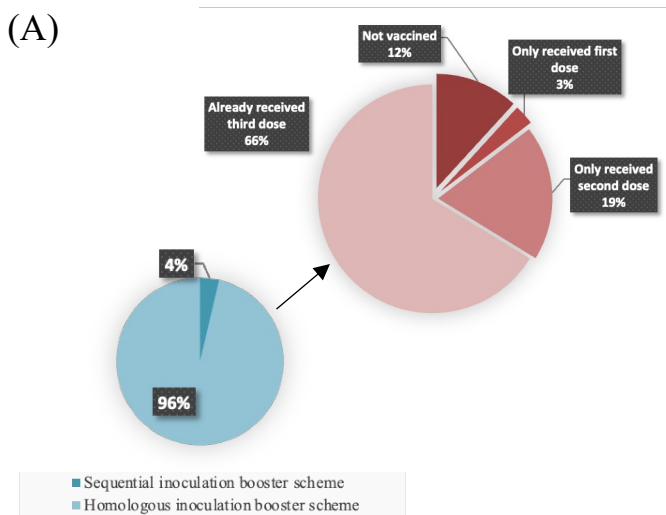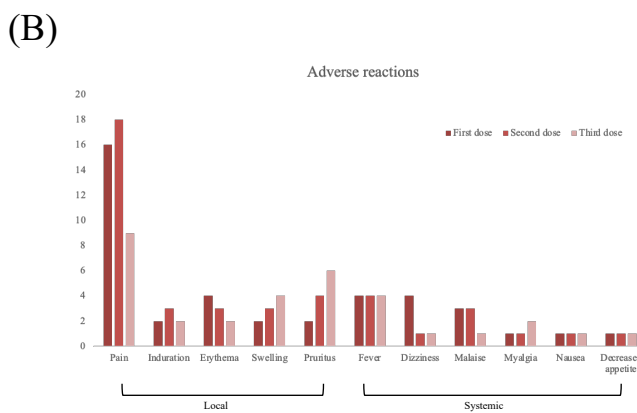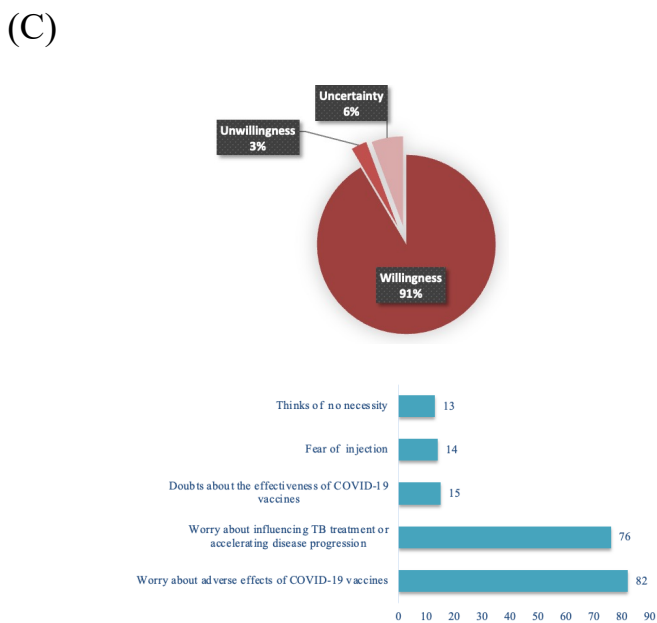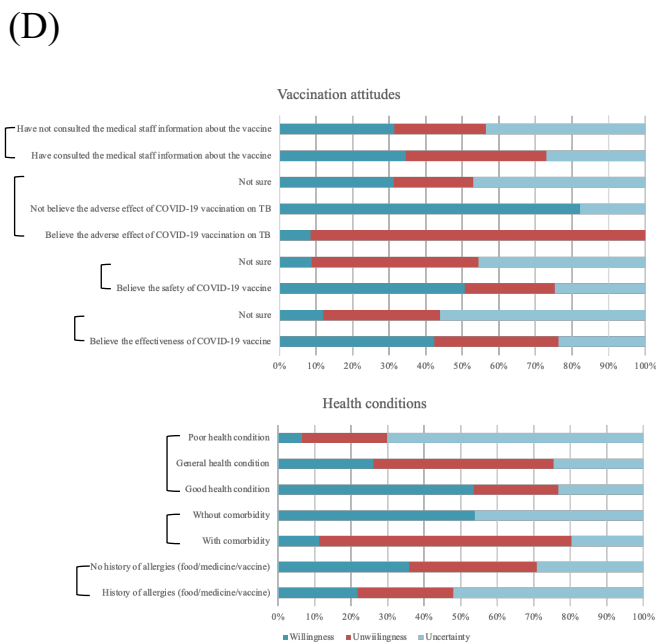

Supplement: mmc2.pdf [file mmc2.pdf]

# Figure S3

(A)

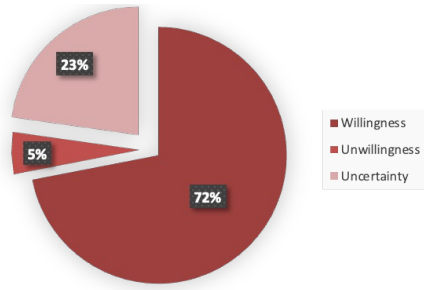

(B)

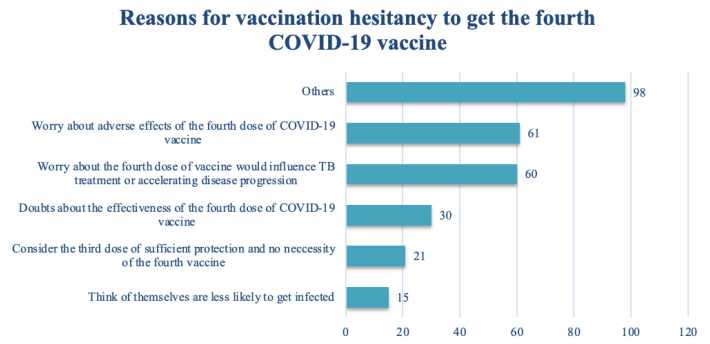

Supplement: mmc3.pdf [file mmc3.pdf]
